# Supplementary material for: Time-Dependent Serial Changes of Antigen-Presenting Cell Subsets in the Ocular Surface Are Distinct between Corneal Sterile Inflammation and Allosensitization in a Murine Model
Source: MDPI journal article supplement (doi:10.3390/cells10092210), 2021-08-26
Supplement: s1 [file s1]

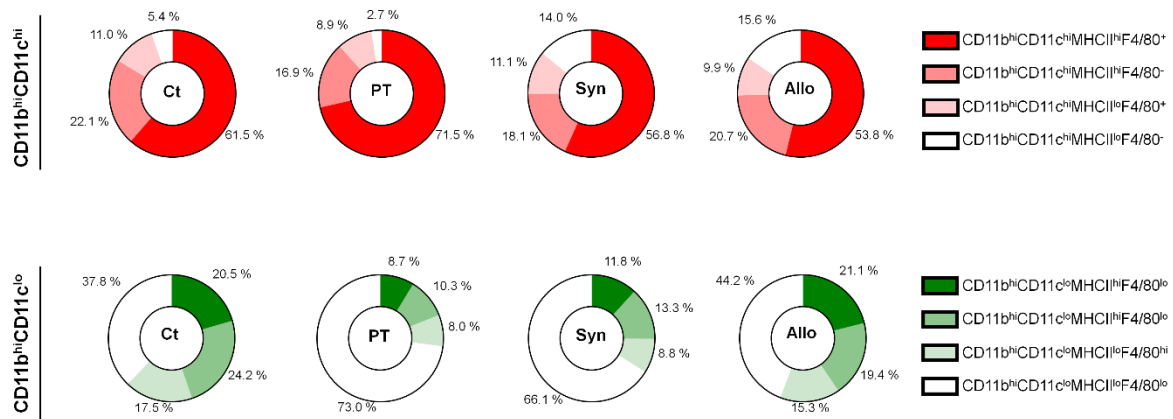

**Supplementary Figure S2. Pie charts presenting the distinct distribution patterns of the APC subgroups, depending on the inflammation type in each subset.**

The mean percentage of each subset according to the expression of 4 kinds of surface expression markers including CD11b, CD11c, MHCII and F4/80 indicates the fractional proportion within the pool of each CD11b<sup>hi</sup>CD11c<sup>hi</sup> and CD11b<sup>hi</sup>CD11c<sup>lo</sup> subset.  $n = 5$  for each group.
