# Supplementary material for: Time-Dependent Serial Changes of Antigen-Presenting Cell Subsets in the Ocular Surface Are Distinct between Corneal Sterile Inflammation and Allosensitization in a Murine Model
Source: MDPI journal article supplement (doi:10.3390/cells10092210), 2021-08-26
Supplement: s1 [file s1]

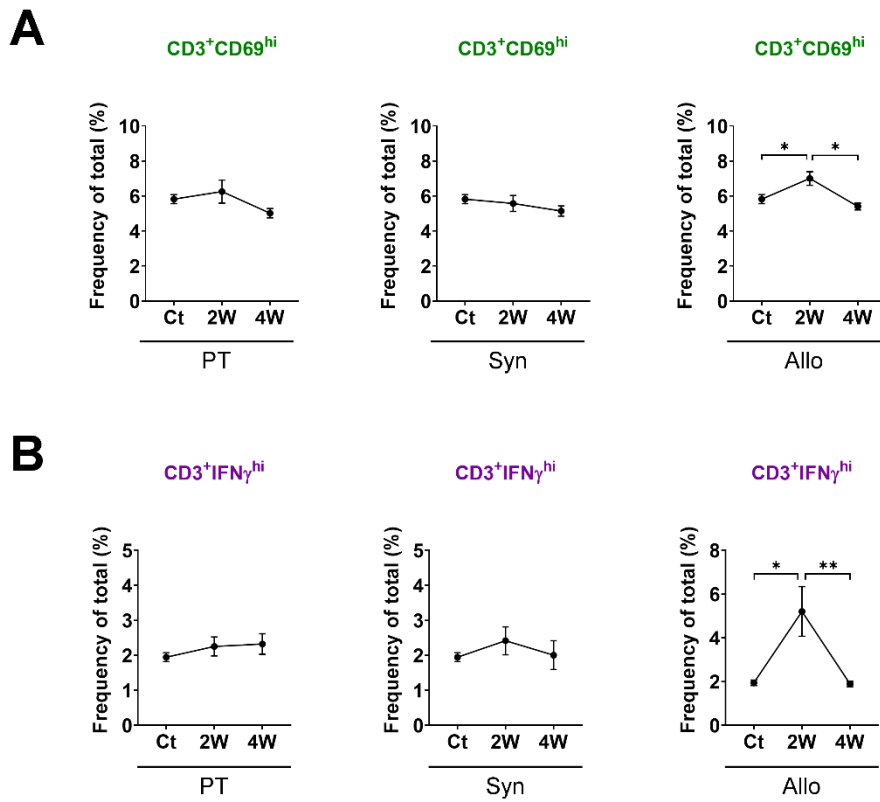

**Supplementary Figure S1. Time-dependent serial changes of T cells in draining lymph nodes in response to either sterile inflammation or allosensitization until four weeks.**

(A, B) Time-dependent frequency (% of total) changes in T cell subsets in the draining lymph nodes. The frequencies (% of total) of the CD69<sup>hi</sup> and IFN $\gamma$ <sup>hi</sup> T cell were increased at two weeks only in the Allo group.  $n = 5$  for each time point and  $n = 12$  for Ct; ANOVA followed by Bonferroni's *post hoc* analyses. \* $p < 0.05$  and \*\* $p < 0.01$ . Values are expressed as mean  $\pm$  standard error measurement. Ct indicates the control group; Syn, the syngeneic corneal transplantation group; and Allo, the allogeneic corneal transplantation group. IFN $\gamma$ , interferon gamma.
